# Supplementary material for: Determinants and Spatial Variation of Skilled Birth Assistance in Nepal: Insights from NDHS 2022
Source: Research Square preprint supplement (doi:10.21203/rs.3.rs-7973803/v1), 2025-11-20
Supplement: Supplementary file 1 [file 68cce4c3f14ae4edfd5fae1d.pdf]

NDHS 2022 Survey 14,845 women aged 15–49

n = 11,155

Currently married women 11,155

n = 2,785

Ever-married women with birth in last 5 years, n = 2,785

Outcome: Skilled Birth Attendance (SBA)

Survey-weighted multivariable logistic regression
